# Supplementary material for: Understanding developmental and adaptive cues in pine through metabolite profiling and co-expression network analysis
Source: PubMed Central journal article supplement (PMC4449534; doi:10.1093/jxb/erv118), 2015-04-01
Supplement: supp_erv118_jexbot142638_file001.pdf [file supp_erv118_jexbot142638_file001.pdf]

**Table S1.** Sampling dates.

| <b>Month</b> | <b>Sampling date</b> | <b>Temp. at<br/>sampling hour</b> | <b>NMR</b> | <b>Microarray</b> |
|--------------|----------------------|-----------------------------------|------------|-------------------|
| January      | 1/30/2012            | 6.6 °C                            | Yes        | Yes               |
| February     | 2/29/2012            | 11.2 °C                           | Yes        |                   |
| March        | 3/30/2012            | 5.7 °C                            | Yes        | Yes               |
| April        | 4/26/2012            | 13.3 °C                           | Yes        |                   |
| May          | 5/30/2012            | 16.6 °C                           | Yes        | Yes               |
| June         | 6/26/2012            | 27.0 °C                           | Yes        |                   |
| July         | 7/27/2012            | 16.5 °C                           | Yes        | Yes               |
| August       | 8/28/2012            | 26.1 °C                           | Yes        |                   |
| September    | 9/28/2012            | 8.2 °C                            | Yes        | Yes               |
| October      | 10/30/2012           | 9.0 °C                            | Yes        |                   |
| November     | 11/30/2012           | 0.5 °C                            | Yes        | Yes               |
| December     | 12/27/2012           | 9.8 °C                            | Yes        |                   |

**Table S2.** List of primers used for RT-qPCR.

| <b>Primer</b> | <b>Primer sequence</b>   | <b>SustainPine ID</b> | <b>Description</b>                  |
|---------------|--------------------------|-----------------------|-------------------------------------|
| qSP3-18113-F  | ATCTCTCAGCACATTCCAACAG   | sp_v3.0_unigene18113  | Actin                               |
| qSP3-18113-R  | TATTGCCACCATCATCTCAAGC   | sp_v3.0_unigene18113  | Actin                               |
| qSP3-4304-F   | CGGTTGTTGTATGTGGGAGC     | sp_v3.0_unigene4304   | 40S Ribosomal protein S27           |
| qSP3-4304-R   | AGCCTTCAGTTAGTCGTGCT     | sp_v3.0_unigene4304   | 40S Ribosomal protein S27           |
| qSP3-1012-F   | TGCTGTTGGAGTCATCAAGG     | sp_v3.0_unigene1012   | Elongation factor 1-alpha           |
| qSP3-1012-R   | CATTTACCCCTTCTTGCCGC     | sp_v3.0_unigene1012   | Elongation factor 1-alpha           |
| qSP3-21410-F  | CCATTGCAGTCTGTGCATCT     | sp_v3.0_unigene21410  | Tubuline 8                          |
| qSP3-21410-R  | GCACAGCAATATGGATCTGGT    | sp_v3.0_unigene21410  | Tubuline 8                          |
| qSP3-96846-F  | TTGGCTGTTGTGTCAATG       | sp_v3.0_unigene96846  | Ubiquitin                           |
| qSP3-96846-R  | ACCGACCGACAAACCAAGTA     | sp_v3.0_unigene96846  | Ubiquitin                           |
| qSP3-35734-F  | GATCGCCTAGCAAATAAATCGC   | sp_v3.0_unigene35734  | Chalcone synthase                   |
| qSP3-35734-R  | TGTGTTTCTGTCTGGTCTGG     | sp_v3.0_unigene35734  | Chalcone synthase                   |
| qSP3-126627-F | TCTCTACTAATCACAGACGCAGC  | sp_v3.0_unigene126627 | Flavonoid-3'-5'-hydroxylase         |
| qSP3-126627-R | TGTGCATAAACTTTGCCTCTACG  | sp_v3.0_unigene126627 | Flavonoid-3'-5'-hydroxylase         |
| qSP3-210278-F | TTCTCACATGGGGTTGCAAGT    | sp_v3.0_unigene210278 | Myb5                                |
| qSP3-210278-R | GACACCGGAAGCACTCTCTT     | sp_v3.0_unigene210278 | Myb5                                |
| qSP3-5645-F   | TCAGGGGTTTTTATTCTATAGCA  | sp_v3.0_unigene5645   | CRK1 protein                        |
| qSP3-5645-R   | GTTGCCAACACTTATTGCAGTT   | sp_v3.0_unigene5645   | CRK1 protein                        |
| qSP3-17872-F  | GTCTAGTGGCCAGCATGAAATT   | sp_v3.0_unigene17872  | AP2 ERF domain-containing protein   |
| qSP3-17872-R  | GGCCTCACATAAAATTGCACCT   | sp_v3.0_unigene17872  | AP2 ERF domain-containing protein   |
| qSP3-7250-F   | TCATCTGCACCGTCTACTTCT    | sp_v3.0_unigene7250   | Aspartic proteinase nepenthesin I   |
| qSP3-7250-R   | ACATTTTCATAAGACCTAGCAGCA | sp_v3.0_unigene7250   | Aspartic proteinase nepenthesin I   |
| qSP3-5704-F   | GCTTTTGGTCTCGAACTTCTG    | sp_v3.0_unigene5704   | Subtilase family protein            |
| qSP3-5704-R   | GCTTGCCCTTCACTTCAAC      | sp_v3.0_unigene5704   | Subtilase family protein            |
| qSP3-17589-F  | AGATGCCTAATGTTGTGCAGT    | sp_v3.0_unigene17589  | NA                                  |
| qSP3-17589-R  | ACATCTAACAAGTTGCCGGAC    | sp_v3.0_unigene17589  | NA                                  |
| qSP3-599-F    | ACAGCGAGAATCACAGATCCA    | sp_v3.0_unigene599    | Hexose transporter                  |
| qSP3-599-R    | CTTGCGAGTAATAAGCGGTAGT   | sp_v3.0_unigene599    | Hexose transporter                  |
| qSP3-17073-F  | AAGACAAAAGTGAAGCTTGC     | sp_v3.0_unigene17073  | geranylgeranyl diphosphate synthase |
| qSP3-17073-R  | GATGTCTGAGCAAGTGGGAA     | sp_v3.0_unigene17074  | geranylgeranyl diphosphate synthase |
| qSP3-27138-F  | CTGCAATGTCATGGGAAGCA     | sp_v3.0_unigene27138  | Myb23                               |
| qSP3-27138-R  | AGGAATTTAATCATCCTGCACCT  | sp_v3.0_unigene27138  | Myb23                               |
| qSP3-33248-F  | ATTCTAATTCTGGCCACGGG     | sp_v3.0_unigene33248  | Myb20                               |
| qSP3-33248-R  | GCTGCGATAATCCACACCCT     | sp_v3.0_unigene33248  | Myb20                               |
| qSP3-6029-F   | GCTCCTCTTAAGCGTGCTAA     | sp_v3.0_unigene6029   | arogenate prephenate dehydratase    |
| qSP3-6029-R   | GAAGTATAGTCGCGCACACC     | sp_v3.0_unigene6029   | arogenate prephenate dehydratase    |
| qSP3-8540-F   | GCAGACTGGCAGCAAAATGA     | sp_v3.0_unigene8540   | 4-coumarate: ligase                 |
| qSP3-8540-R   | CGCTTACTCTGCACCACTTT     | sp_v3.0_unigene8540   | 4-coumarate: ligase                 |
| qSP3-31154-F  | CCACCTCCACCGTTGAAATC     | sp_v3.0_unigene31154  | 4-coumarate: ligase                 |
| qSP3-31154-R  | GTATTGGCCGCGTCATG        | sp_v3.0_unigene31154  | 4-coumarate: ligase                 |
| qSP3-16566-F  | AGATTGCAAGCCATGGAGGG     | sp_v3.0_unigene16566  | prephenate aminotransferase         |
| qSP3-16566-R  | GCATGTCATCATTGCCGAAGGC   | sp_v3.0_unigene16566  | prephenate aminotransferase         |

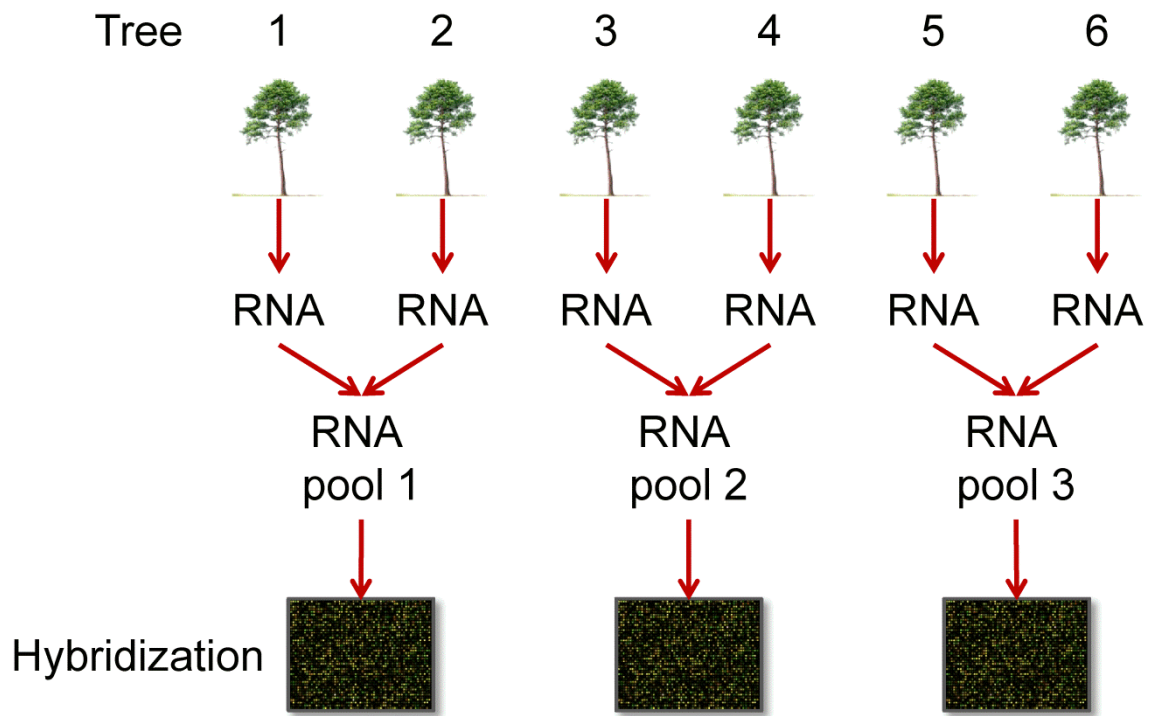

**Figure S1.** Microarray hybridization strategy.

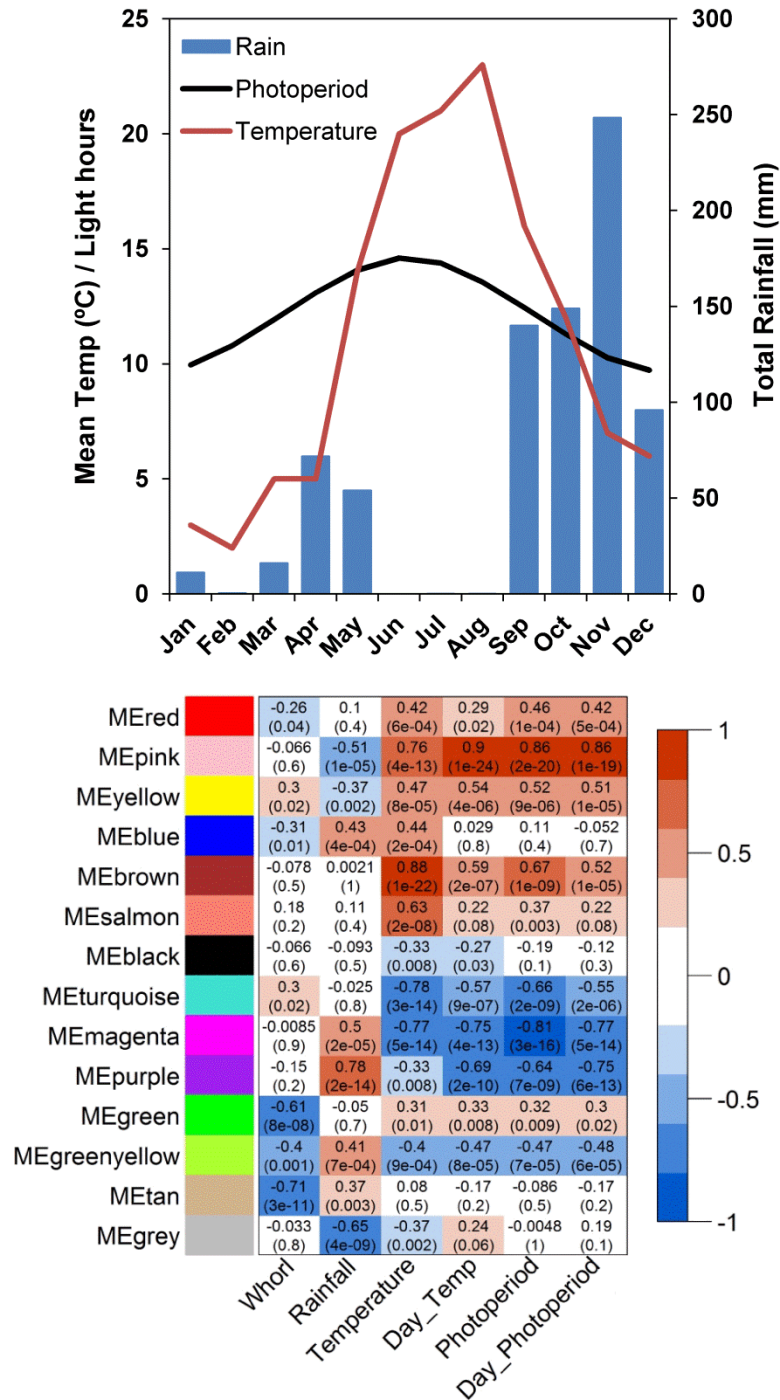

**Figure S2. Upper panel.** Annual photoperiod, average monthly temperature and monthly accumulated rainfall. **Lower panel.** Pearson correlations between eigengene modules and environmental and developmental factors, including temperature at sample harvesting hour and photoperiod at sampling day.

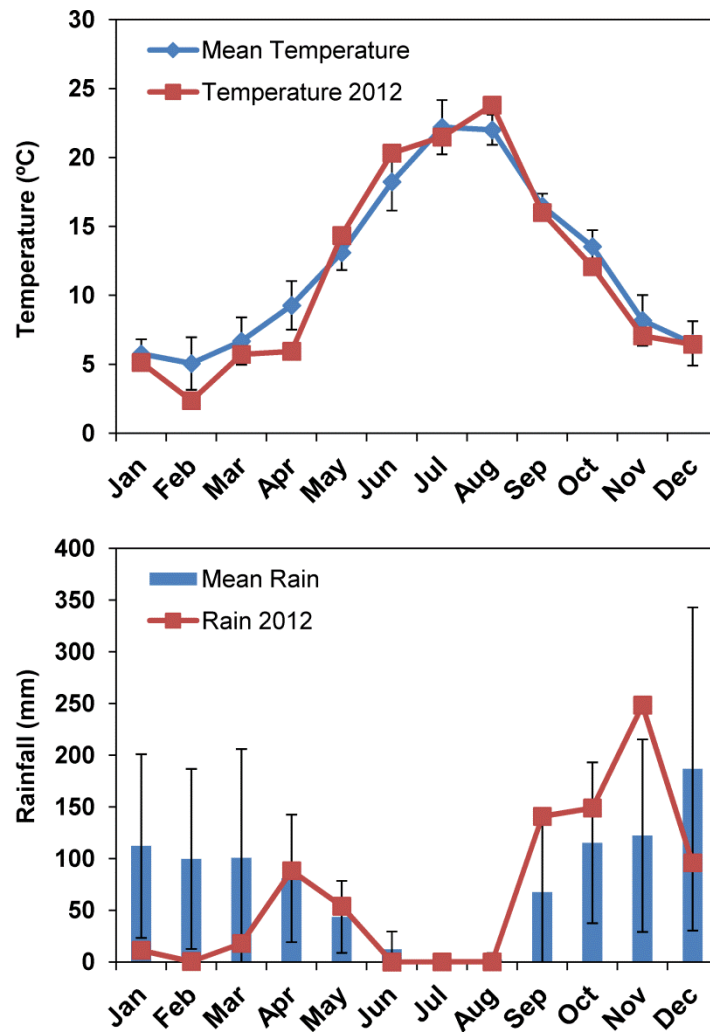

**Figure S3. Upper panel.** Average monthly temperature since 2007 and monthly temperature in 2012. **Lower panel.** Average monthly accumulated rainfall since 1994 and monthly accumulated rainfall in 2012.

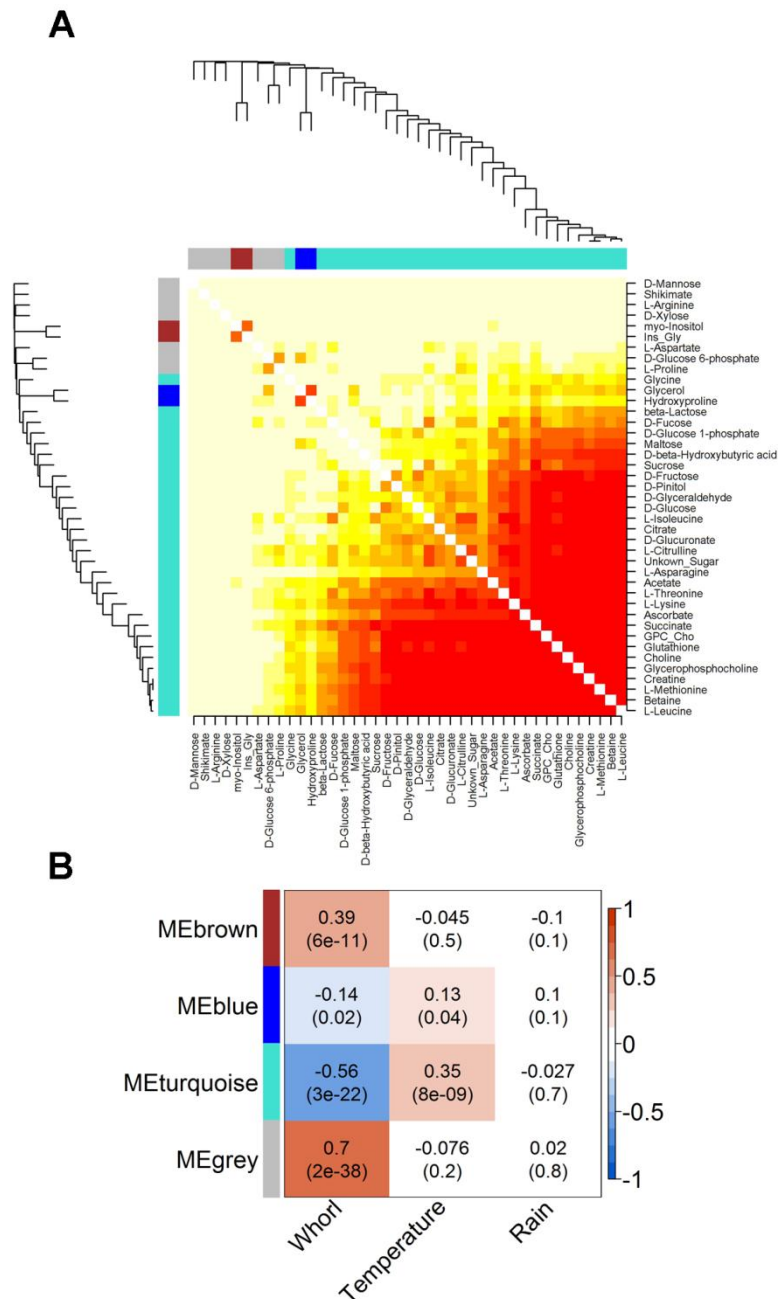

**Figure S4. Metabolite-weighted co-expression network heatmap and correlations between eigengene modules and traits.** **A** Metabolite network heatmap and dendrogram obtained with WGCNA. The intensity of red coloration indicates the strength of relationships between metabolites. **B** Pearson correlations between metabolite levels and Whorl, Temperature and Rain, with *p-values* in parenthesis. The correlations are deemed to be significant when  $p < 0.05$ . The colours in the matrix boxes show the correlation magnitude and direction; intense blue and red indicate strong negative and positive correlations, respectively. High temperature is positively correlated with the metabolite accumulation. Older whorls are positively correlated with metabolite accumulation

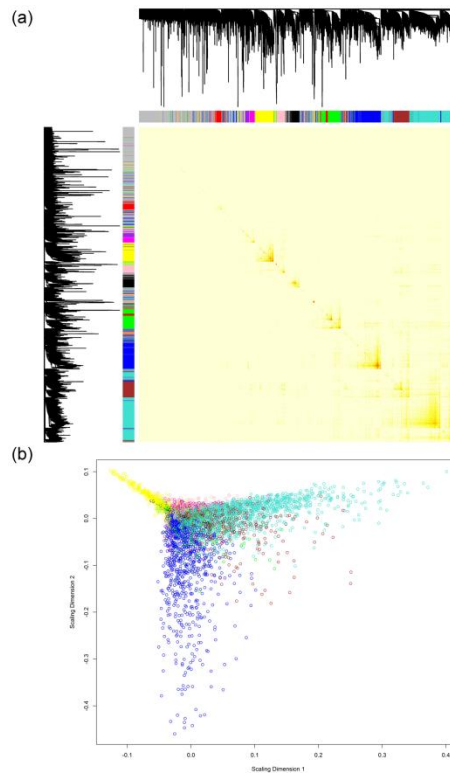

**Figure S5.** Global network representation. (a) Global network heatmap plot from WGCNA. (b) Multidimensional scaling (MDS) plot from WGCNA.

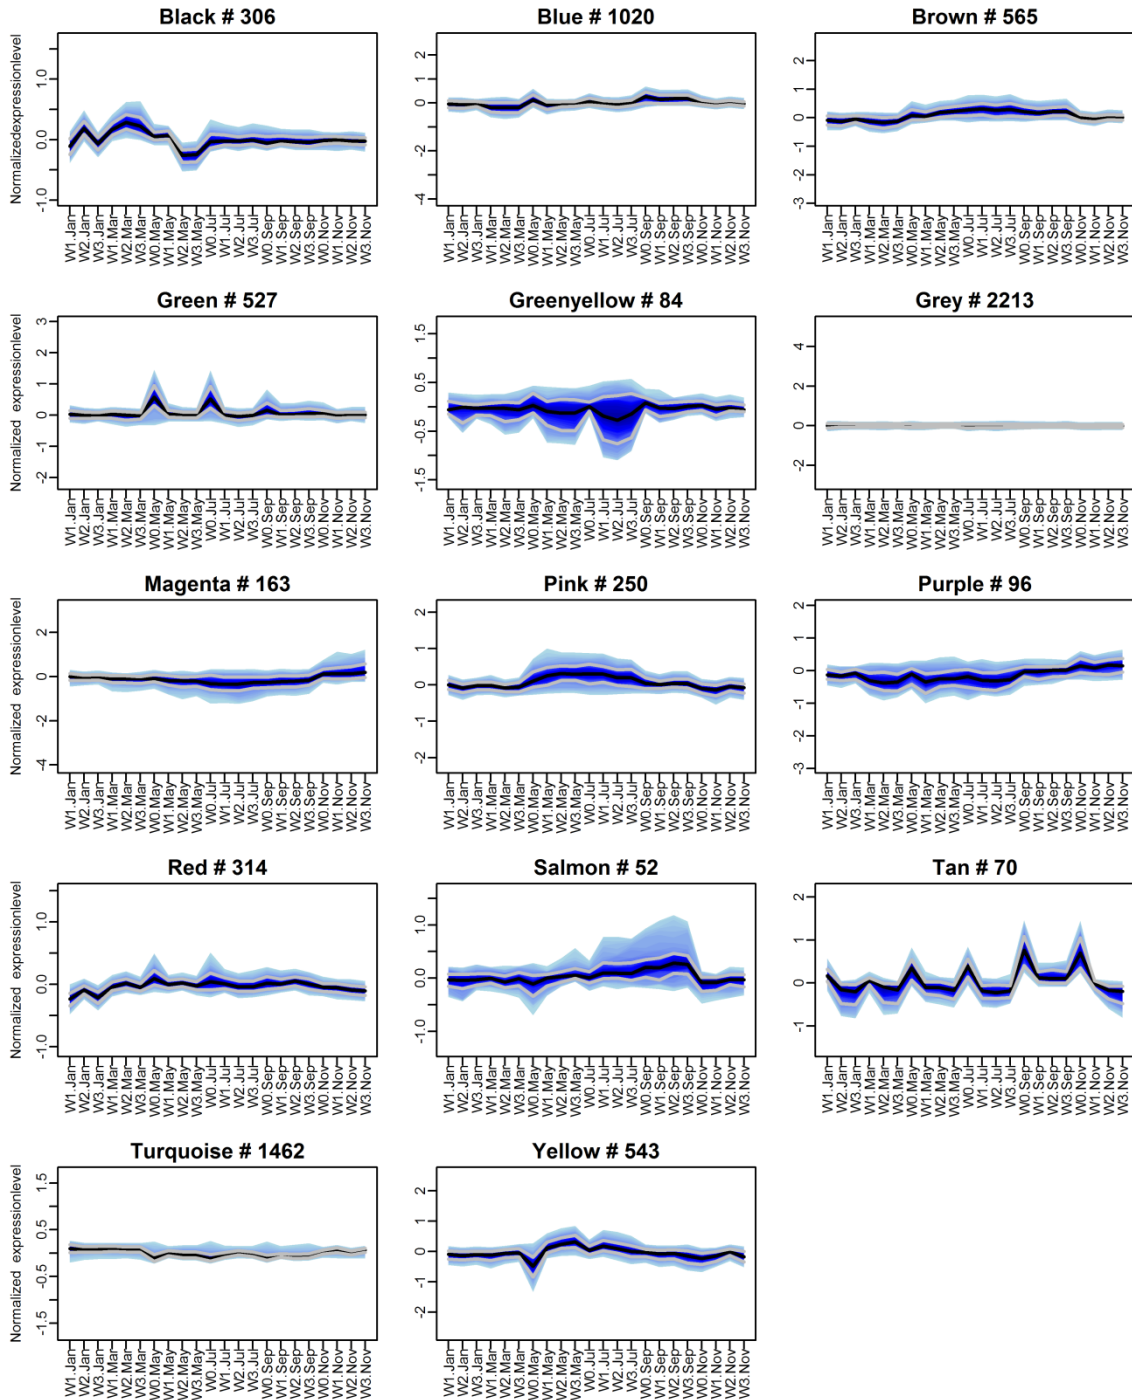

**Figure S6.** Normalized expression values for each gene in the gene co-expression modules from weighted gene co-expression network analysis (WGCNA). The number of genes in each group is indicated close to the module name. Quartiles are indicated by grey lines for 0.25 and 0.75 and a black line for 0.5.



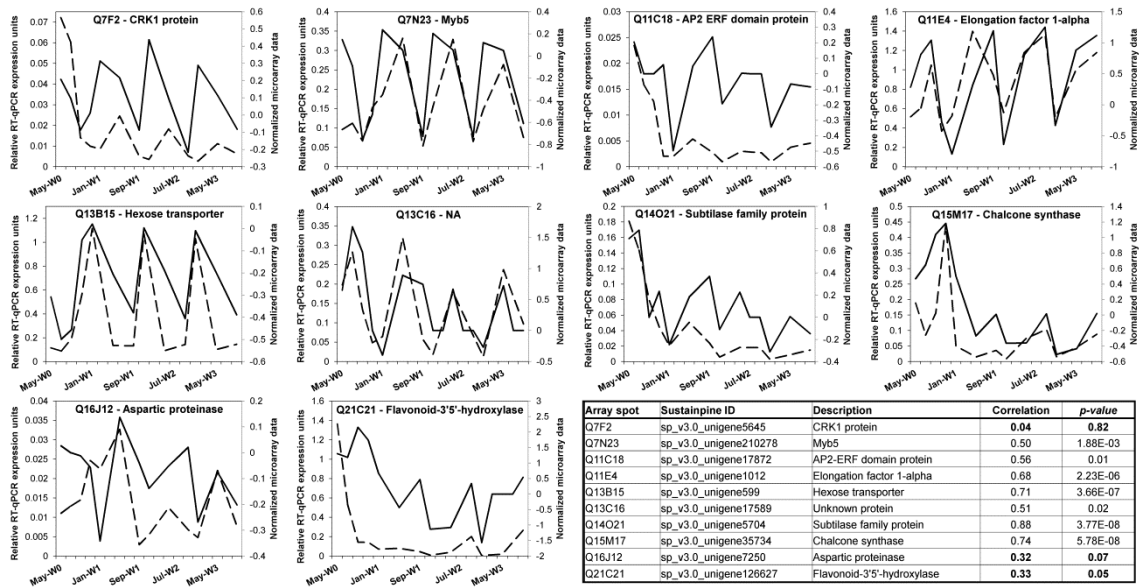

**Figure S7.** Comparison between RT-qPCR and microarray expression data to validate the microarray hybridizations. The continuous line corresponds to the microarray data and the broken line to the RT-qPCR data. Pearson correlations between both pool of data for each gene and their *p-values* are shown in the table. The correlations are significant with a *p-value* < 0.05.

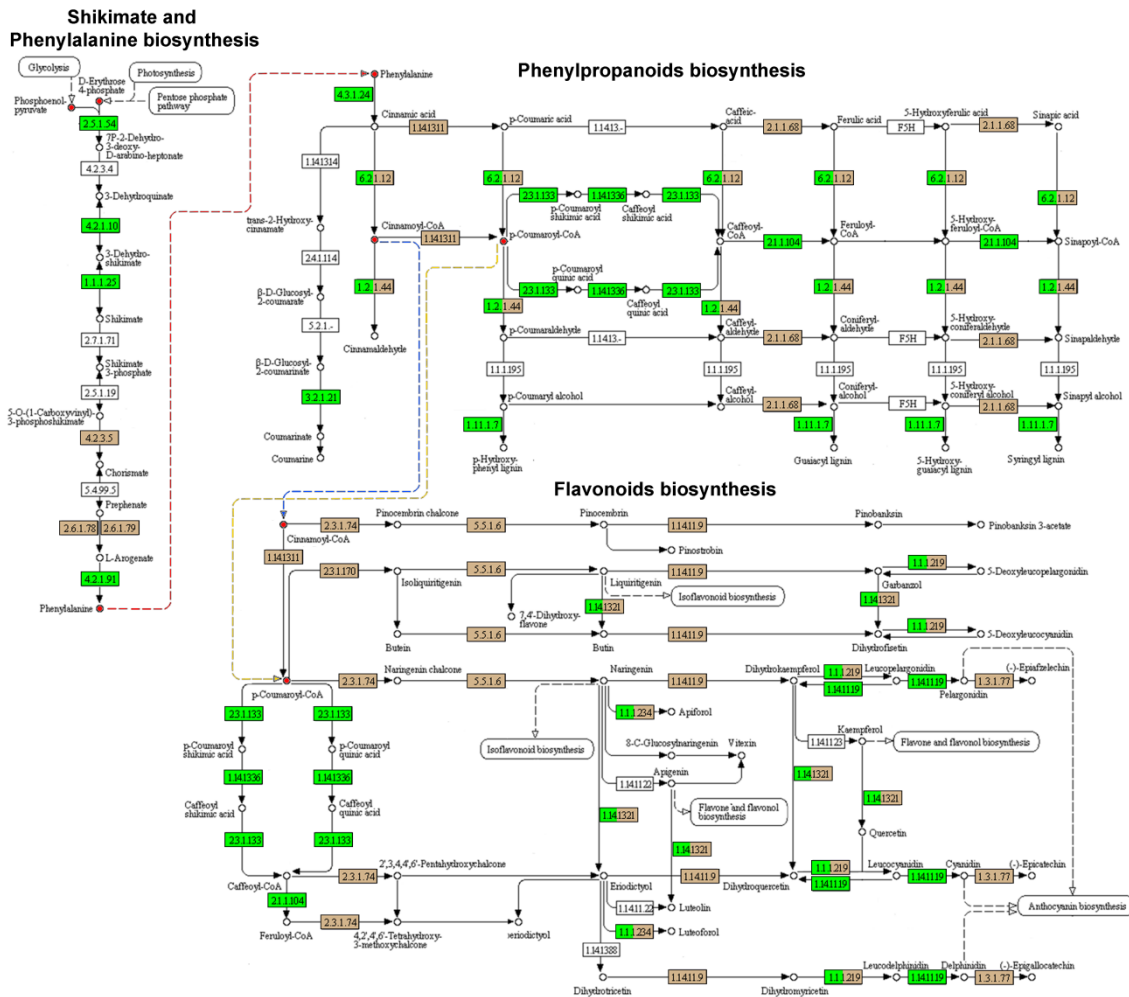

**Figure S8.** KEGG shikimate, phenylalanine, phenylpropanoid and flavonoid pathways with functional assignments for the green and tan eigengene modules. Functions assigned to genes of the green and tan eigengene modules are indicated by the green and tan colours in the reaction boxes, respectively. The id numbers for the original KEGG pathways were: ko00400 (shikimate and phenylalanine biosynthesis), ko00940 (phenylpropanoid biosynthesis) and ko00941 (flavonoid biosynthesis).

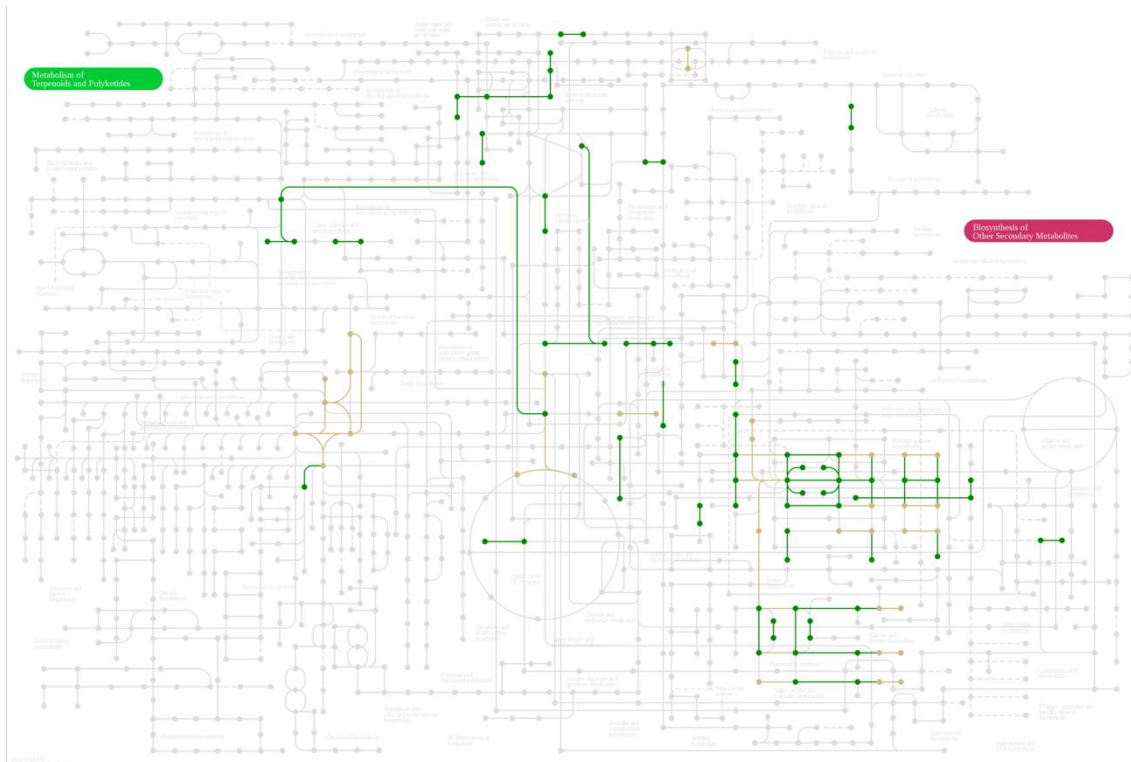

**Figure S9.** KEGG pathway for the biosynthesis of secondary metabolites (ko01110) including the brown and green-yellow modules.

## Methods S1. Metabolite network analysis (WGCNA) script.

```
#Metabolite and Trait data load
getwd();
workingDir = "C:/Users/...";
setwd(workingDir);
library(WGCNA);
options(stringsAsFactors = FALSE);
femData = read.csv("MetaboliteData.csv");
traitData = read.csv("Traits.csv");

femaleSamples1 = rownames(datExpr0);
traitRows1 = match(femaleSamples1, traitData$Sample);
datTraits1 = traitData[traitRows1, -1];
rownames(datTraits1) = traitData[traitRows1, 1];
collectGarbage();
ExprTraits = data.frame(datTraits1$Whor1, datTraits1$Month,
datExpr0)

#Unnecessary data removing and data transposing

datExpr0 = as.data.frame(t(femData[, -c(1)]));
names(datExpr0) = femData$Metabolite;
rownames(datExpr0) = names(femData)[-c(1)];

# Choosing the soft-thresholding power: analysis of network
topology

powers = c(c(1:10), seq(from = 12, to=20, by=2))
sft = pickSoftThreshold(datExpr0, powerVector = powers,
verbose = 5)
write.csv(sft, file="SoftTreshold_Powers_for_Network.csv")
plot(sft$fitIndices[,1],
sign(sft$fitIndices[,3])*sft$fitIndices[,2],
xlab="Soft Threshold (power)",ylab="Scale Free Topology
Model Fit,signed R^2",type="n",
main = paste("Scale independence"));
text(sft$fitIndices[,1],
sign(sft$fitIndices[,3])*sft$fitIndices[,2],
labels=powers,cex=cex1,col="red");
abline(h=0.85,col="red")
plot(sft$fitIndices[,1], sft$fitIndices[,5],
xlab="Soft Threshold (power)",ylab="Mean Connectivity",
type="n",
main = paste("Mean connectivity"))
text(sft$fitIndices[,1], sft$fitIndices[,5], labels=powers,
cex=cex1,col="red")
k=softConnectivity(datE=datExpr0,power=6)
scaleFreePlot(k, main="Check scale free topology\n",
pch=19, col="black")
```

```

# Network construction

net = blockwiseModules(datExpr0, maxBlockSize = 10000,
power = 6, minModuleSize = 2,
reassignThreshold = 0, mergeCutHeight = 0.25,
numericLabels = TRUE, pamRespectsDendro = FALSE,
saveTOMs = TRUE,
saveTOMfileBase = "TOM1",
verbose = 3, checkMissingData = F)
table(net$colors)
moduleLabels = net$colors
moduleColors = labels2colors(net$colors)
MEs = net$MEs;
geneTree = net$dendrograms[[1]];

#Correlations between gene modules and traits

nGenes = ncol(datExpr0);
nSamples = nrow(datExpr0);
MEs0 = moduleEigengenes(datExpr0, moduleColors)$eigengenes
MEs = orderMEs(MEs0)
moduleTraitCor = cor(MEs, datTraits, use = "p");
moduleTraitPvalue = corPvalueStudent(moduleTraitCor,
nSamples);
textMatrix = paste(signif(moduleTraitCor, 2), "\n(",
signif(moduleTraitPvalue, 1), ")", sep = "");
dim(textMatrix) = dim(moduleTraitCor)
par(mar = c(5, 10, 3, 5));
#par(mar = c(0.7, 1, 0.35, 0.35))
labeledHeatmap(Matrix = moduleTraitCor,
xLabels = names(datTraits),
yLabels = names(MEs),
ySymbols = names(MEs),
colorLabels = FALSE,
colors = blueWhiteRed(50),
textMatrix = textMatrix,
setStdMargins = FALSE,
cex.text = 1.5,
cex.main = 2,
cex.lab = 1.5,
zlim = c(-1,1),
main = paste("Module-trait relationships"))

# Plot the network

dissTOM = 1-TOMsimilarityFromExpr(datExpr0, power = 6);
plotTOM = dissTOM^7;
diag(plotTOM) = NA;
TOMplot(plotTOM, geneTree, moduleColors, main = "Network
heatmap plot", mar=c(9.5, 9.5))

```

```
# Metabolite screening method based on a detailed
definition module membership (it can be made for any trait
changing to the appropriate "y" value)
```

```
NS1=networkScreening(y=datTraits$Whorl,          datME=datME,
datExpr=datExpr0,          oddPower=3,          blockSize=2000,
minimumSampleSize=4,addMEy=TRUE,          removeDiag=FALSE,
weightESy=0.5, getQValues=TRUE)
```

```
# Output of the results of network screening analysis
```

```
GeneResultsNetworkScreening1=data.frame(GeneName=row.names(
NS1), NS1)
```

```
probes = names(datExpr0)
```

```
geneInfo1 = data.frame(name = probes,
                        moduleColor = moduleColors,
                        GeneResultsNetworkScreening1)
```

```
write.table(geneInfo1,
```

```
file="GeneResultsNetworkScreeningWhorl.csv",
```

```
row.names=F, sep=",")
```

```
datMEy = data.frame(datTraits$Whorl, datME)
```

```
eigengeneSignificancel = cor(datMEy, datTraits$Whorl);
```

```
eigengeneSignificancel[1,1]
```

```
=
```

```
(1+max(eigengeneSignificancel[-1, 1]))/2
```

```
eigengeneSignificancel.pvalue
```

```
=
```

```
corPvalueStudent(eigengeneSignificancel, nSamples
```

```
=
```

```
length(datTraits$Whorl))
```

```
namesME=names(datMEy)
```

```
out1=data.frame(t(data.frame(eigengeneSignificancel,
                              eigengeneSignificancel.pvalue,
```

```
namesME, t(datMEy))))
```

```
dimnames(out1)[[1]][1]="EigengeneSignificance"
```

```
dimnames(out1)[[1]][2]="EigengeneSignificancePvalue"
```

```
dimnames(out1)[[1]][3]="ModuleEigengeneName"
```

```
dimnames(out1)[[1]][-c(1:3)]=dimnames(datExpr0)[[1]]
```

```
write.table(out1,
```

```
file="MEResultsNetworkScreeningWhorl.csv", row.names=TRUE,
```

```
col.names = TRUE, sep=",")
```

```
# Metabolite screening method based on a detailed
definition module membership (it can be made for any trait
changing to the appropriate "y" value)
```

```
NS2=networkScreening(y=datTraits$Month,          datME=datME,
datExpr=datExpr0,          oddPower=3,          blockSize=2000,
minimumSampleSize=4,addMEy=TRUE,          removeDiag=FALSE,
weightESy=0.5, getQValues=TRUE)
```

```
# Output of the results of network screening analysis
```

```

GeneResultsNetworkScreening2=data.frame(GeneName=row.names(
NS2), NS2)
geneInfo2 = data.frame(name = probes,
                        moduleColor = moduleColors,
                        GeneResultsNetworkScreening2)

write.table(geneInfo2,
file="GeneResultsNetworkScreeningMonth.csv",
row.names=F, sep=",")
datMEy = data.frame(datTraits$Month, datME)
eigengeneSignificance2 = cor(datMEy, datTraits$Month);
eigengeneSignificance2[1,1] =
(1+max(eigengeneSignificance2[-1, 1]))/2
eigengeneSignificance2.pvalue =
corPvalueStudent(eigengeneSignificance2, nSamples =
length(datTraits$Month))
namesME=names(datMEy)
out2=data.frame(t(data.frame(eigengeneSignificance2,
eigengeneSignificance2.pvalue,
namesME, t(datMEy))))
dimnames(out2)[[1]][1]="EigengeneSignificance"
dimnames(out2)[[1]][2]="EigengeneSignificancePvalue"
dimnames(out2)[[1]][3]="ModuleEigengeneName"
dimnames(out2)[[1]][-c(1:3)]=dimnames(datExpr0)[[1]]
write.table(out2,
file="MEResultsNetworkScreeningMonth.csv", row.names=TRUE,
col.names = TRUE, sep=",")

```

## Methods S2. Metabolite PCA R script.

```
#Metabolite data load

getwd();
workingDir = "C:/Users/...";
setwd(workingDir);
Data = read.csv("MetaboliteData.csv")
dim(Data)
names(Data)
datExpr1 = as.data.frame(Data[, -c(1)])
dim(datExpr1)
names(datExpr1)
rownames(datExpr1) = Data$Metabolite
rownames(datExpr1)

#PCA calculation

Metabolites_pca <- prcomp(datExpr1)
summary(Metabolites_pca)

#Component plotting

plot(Metabolites_pca, ylim=c(0,200))

#PCA plotting, only metabolites

biplot(Metabolites_pca,var.axes=FALSE, col=c("black",
"red"), cex=c(1,1),expand=0, xlim=c(-0.35,1))

#PCA plotting, metabolites and samples

biplot(Metabolites_pca,var.axes=FALSE, col=c("black",
"red"), cex=c(0.5,0.8),expand=1)
```



**Methods S3.** BABAR script for microarray data normalization.

```
library(babar)
library(limma)
basedir<-"~/microarray"
setwd(basedir)
REFERENCEDETECTION="OFF"
NUMBEROFSD<-3
SPAN<-0.3
LOESS<-TRUE
FINALCENTRE<-TRUE
BOXPLOTS=TRUE
bluefiles<-dir(basedir, pattern=".xls$", full.names=TRUE)
bluefiles<-NULL
genepixfiles<-dir(basedir, pattern=".gpr$",
full.names=TRUE)
ratiodata<-babar(bluefiles,genepixfiles)
a<-ratiodata$exprs*(-1)
results<-cbind(ratiodata[["genes"]], a)
write.table(results, file = "c:/microarray/Results.txt",
sep="\t", col.names=NA)
colnames(ratiodata[["exprs"]])
```

#### Methods S4. Gene network analysis (WGCNA) script.

```
#Microarray and Trait data load

getwd()
workingDir = "C:/Users/..."
setwd(workingDir)
library(WGCNA)
options(stringsAsFactors = FALSE)
femData = read.csv("MicroarrayData1.csv")
traitData = read.csv("Traits1.csv")

femaleSamples1 = rownames(datExpr0);
traitRows1 = match(femaleSamples1, traitData$Sample)
datTraits1 = traitData[traitRows1, -1]
rownames(datTraits1) = traitData[traitRows1, 1]
collectGarbage()
ExprTraits = data.frame(datTraits1$Whorl, datTraits1$Month,
datExpr0)

#Unnecessary data removing and data transposing

datExpr0 = as.data.frame(t(femData[, -c(1)]))
names(datExpr0) = femData$gene;
rownames(datExpr0) = names(femData)[-c(1)]

#Mean expression calcule

meanExpressionByArray=apply( datExpr0,1,mean, na.rm=T)
NumberMissingByArray=apply( is.na(data.frame(datExpr0)),1,
sum)
NumberMissingByArray
barplot(meanExpressionByArray, ylab = "Mean expression",
main ="Mean expression across samples", names.arg =
rownames(datExpr0) ,
col=rainbow(length(unique(ExprTraits$datTraits1.Whorl)))[as
.factor(ExprTraits$datTraits1.Whorl)], cex.names =
0.6,las=2)

#Verification and removal of genes with too many missing
values

gsg = goodSamplesGenes(datExpr0, verbose = 3)
gsg$allOK
if (!gsg$allOK)
{
if (sum(!gsg$goodGenes)>0)
printFlush(paste("Removing genes:",
paste(names(datExpr0)[!gsg$goodGenes], collapse = ", ")))
if (sum(!gsg$goodSamples)>0)
```

```

printFlush(paste("Removing samples:",
paste(rownames(datExpr0)[!gsg$goodSamples], collapse = ",
"))
datExpr0 = datExpr0[gsg$goodSamples, gsg$goodGenes]
}

#Hierarchical clusterin of the samples

sampleTree = flashClust(dist(datExpr0), method = "average")
par(cex = 0.6);
par(mar = c(1,5,2,0.5))
plot(sampleTree, main = "Sample clustering to detect
outliers", sub="", xlab="", cex.lab = 1.5, cex.axis = 1.5,
cex.main = 2)
abline(h = 25, col = "red")

#Mean expression calcule after gene reomval

meanExpressionByArray=apply( datExpr0,1,mean, na.rm=T)
NumberMissingByArray=apply( is.na(data.frame(datExpr0)),1,
sum)
NumberMissingByArray
par(mar=c(8,4,4,0))
barplot(meanExpressionByArray, ylab = "Mean expression",
main ="Mean expression across samples", names.arg =
rownames(datExpr0),col=rainbow(length(unique(ExprTraits$dat
Traits1.Whorl))))[as.factor(ExprTraits$datTraits1.Whorl)],
cex.names = 0.6,las=2)

# Removal of outlier samples

rownames(datExpr0)
datExpr<-datExpr0[-(47), ]
sampleTree = flashClust(dist(datExpr), method = "average")
par(cex = 0.6);
par(mar = c(1,5,2,0.5))
plot(sampleTree, main = "Sample clustering to detect
outliers", sub="", xlab="", cex.lab = 1.5, cex.axis = 1.5,
cex.main = 2)
abline(h = 25, col = "red")

#Mean expression after gene and sample removals

meanExpressionByArray=apply( datExpr,1,mean, na.rm=T)
NumberMissingByArray=apply( is.na(data.frame(datExpr)),1,
sum)
NumberMissingByArray
femaleSamples = rownames(datExpr)
traitRows = match(femaleSamples, traitData$Sample)
datTraits = traitData[traitRows, -1]

```

```

rownames(datTraits) = traitData[traitRows, 1]
collectGarbage()
ExprTraits1 = data.frame(datTraits$Whorl, datTraits$Month,
datExpr)
par(mar=c(8,4,4,0))
barplot(meanExpressionByArray, ylab = "Mean expression",
main = "Mean expression across samples", names.arg =
rownames(datExpr), col=rainbow(length(unique(ExprTraits1$dat
Traits.Whorl))))[as.factor(ExprTraits1$datTraits.Whorl)],
cex.names = 0.6, las=2)

# Choosing the soft-thresholding power: analysis of network
topology

powers = c(c(1:10), seq(from = 12, to=20, by=2))
sft = pickSoftThreshold(datExpr, powerVector = powers,
verbose = 5)
write.csv(sft, file="SoftTreshold_Powers_for_Network.csv")
sizeGrWindow(9, 5)
par(mfrow = c(1,2))
cex1 = 0.9
plot(sft$fitIndices[,1], -
sign(sft$fitIndices[,3])*sft$fitIndices[,2], xlab="Soft
Threshold (power)", ylab="Scale Free Topology Model
Fit, signed R^2", type="n", main = paste("Scale
independence"))
text(sft$fitIndices[,1], -
sign(sft$fitIndices[,3])*sft$fitIndices[,2], labels=powers, c
ex=cex1, col="red")
abline(h=0.85, col="red")
plot(sft$fitIndices[,1], sft$fitIndices[,5], xlab="Soft
Threshold (power)", ylab="Mean Connectivity", type="n", main
= paste("Mean connectivity"))
text(sft$fitIndices[,1], sft$fitIndices[,5], labels=powers,
cex=cex1, col="red")
k=softConnectivity(datE=datExpr, power=14)
sizeGrWindow(10,5)
par(mfrow=c(1,2))
hist(k, col="darkgrey")
scaleFreePlot(k, main="Check scale free topology\n",
pch=19, col="black")

# Network constrcuton

net = blockwiseModules(datExpr, maxBlockSize = 10000, power
= 14, minModuleSize = 30, reassignThreshold = 0,
mergeCutHeight = 0.25, numericLabels = TRUE,
pamRespectsDendro = FALSE, saveTOMs = TRUE, saveTOMFileBase
= "TOM", verbose = 3)
table(net$colors)
sizeGrWindow(12, 9)

```

```

mergedColors = labels2colors(net$colors)
plotDendroAndColors(net$dendrograms[[1]],
mergedColors[net$blockGenes[[1]]], "Module colors",
dendroLabels = FALSE, hang = 0.03, addGuide = TRUE,
guideHang = 0.05)
moduleLabels = net$colors
moduleColors = labels2colors(net$colors)
MEs = net$MEs
geneTree = net$dendrograms[[1]]

#Correlations between gene modules and traits

nGenes = ncol(datExpr)
nSamples = nrow(datExpr)
MEs0 = moduleEigengenes(datExpr, moduleColors)$eigengenes
MEs = orderMEs(MEs0)
moduleTraitCor = cor(MEs, datTraits, use = "p")
moduleTraitPvalue = corPvalueStudent(moduleTraitCor,
nSamples)
sizeGrWindow(10,6)
textMatrix = paste(signif(moduleTraitCor, 2), "\n(",
signif(moduleTraitPvalue, 1), ")", sep = "")
dim(textMatrix) = dim(moduleTraitCor)
par(mar = c(9, 11, 3, 0))
labeledHeatmap(Matrix = moduleTraitCor, xLabels =
names(datTraits), yLabels = names(MEs), ySymbols =
names(MEs), colorLabels = FALSE, colors = blueWhiteRed(50),
textMatrix = textMatrix, setStdMargins = FALSE, cex.text =
0.5, cex.main = 2, cex.lab = 1.2, zlim = c(-1,1), main =
paste("Module-trait relationships"))

#Representing modules by eigengenes and relating eigengenes
to one another

signif(cor(MEs0, use="p"), 2)

#We define a dissimilarity measure between the module
eigengenes that keeps track of the sign of the correlation
#between the module eigengenes, and use it to cluster the
eigengene:
dissimME=(1-t(cor(MEs0, method="p")))/2
hclustdatME=hclust(as.dist(dissimME), method="average" )
par(mfrow=c(1,1))
plot(hclustdatME, main="Clustering tree based of the module
eigengenes")
MEs = orderMEs(MEs0)
moduleTraitCor = cor(MEs, datTraits, use = "p")
moduleTraitPvalue = corPvalueStudent(moduleTraitCor,
nSamples)

```

```

#Pairwise scatter plots of the samples (arrays) along the
module eigengenes (it can be made for any trait changing
"y" value)
plotMEpairs(MEs0,y=datTraits$Whorl, main= "Relationship
between module eigengenes - Whorl", cex.main=2)

# Recalculate module eigengenes

MEas = moduleEigengenes(datExpr, moduleColors, excludeGrey
= FALSE, grey = ifelse(is.numeric(colors), 0,
"orange"))$eigengenes

# Plotting relationships of selected traits with eigengene
modules (it can be made for any trait selecting the appropriate
trait in "datTraits$...")
Sucrose = as.data.frame(datTraits$Sucrose)
names(Sucrose) = "Sucrose"
Month = as.data.frame(datTraits$Month)
names(Month) = "Month"
Whorl = as.data.frame(datTraits$Whorl)
names(Whorl) = "Whorl"
Arginine = as.data.frame(datTraits$L.Arginine)
names(Arginine) = "Arginine"
MET = orderMEs(cbind(MEas, Sucrose, Month, Whorl,
Arginine))
sizeGrWindow(5,7.5)
par(cex = 0.9)
plotEigengeneNetworks(MET, heatmapColors=blueWhiteRed(50),
excludeGrey = FALSE, greyLabel = "orange", "", marDendro =
c(0,4,1,2), marHeatmap = c(4,4,1,2), cex.lab = 0.8,
xLabelsAngle= 90)

# Plot the network

dissTOM = 1-TOMsimilarityFromExpr(datExpr, power = 14)
plotTOM = dissTOM^7;
diag(plotTOM) = NA;
sizeGrWindow(9,9)
TOMplot(plotTOM, geneTree, moduleColors, main = "Network
heatmap plot, all genes")

# Plot 400 selected genes of the network. The image file of
the plot with all genes can be too big.

nGenes = ncol(datExpr)
nSamples = nrow(datExpr)
nSelect = 400
set.seed(10)
select = sample(nGenes, size = nSelect)
selectTOM = dissTOM[select, select]

```

```

selectTree = flashClust(as.dist(selectTOM), method =
"average")
selectColors = moduleColors[select]
sizeGrWindow(9,9)
plotDiss = selectTOM^7
diag(plotDiss) = NA
TOMplot(plotDiss, selectTree, selectColors, main = "Network
heatmap plot, selected genes")

#Multi-dimensional scaling plot of the network

cmd1=cmdscale(as.dist(dissTOM),2)
sizeGrWindow(7, 6)
par(mfrow=c(1,1))
plot(cmd1, col=as.character(moduleColors), main="MDS plot",
xlab="Scaling Dimension 1", ylab="Scaling Dimension 2")

# Recalculate module eigengenes

datME=moduleEigengenes(datExpr,moduleColors)$eigengenes

# Measure of module significance as average gene
significance (it can be made for al the traits changing the
"datTraits~$..." value)

GS1=as.numeric(cor(datTraits$Whor1,datExpr, use="p"))
GeneSignificance1=abs(GS0)
ModuleSignificanceWhor1=tapply(GeneSignificance0,
moduleColors, mean, na.rm=T)
sizeGrWindow(8,7)
par(mar=c(8.3,5,2,2))
plotModuleSignificance(GeneSignificance1,moduleColors,
cex=1.5, cex.main=2, cex.lab=1.5, cex.axis=1.5,
cex.sub=1.5,axis.lty=1, las=3, ylim=c(0,0.7))

# Write the module significance data frame into a file

moduleInfo0 = data.frame( ModuleSignificanceTree,
ModuleSignificanceWhor1, ModuleSignificanceMonth,
ModuleSignificanceAcetate, ModuleSignificanceArginine,
ModuleSignificanceAscorbate, ModuleSignificanceAspartate,
ModuleSignificanceAsparagine, ModuleSignificanceBetaine,
ModuleSignificanceHydroxybutyric,
ModuleSignificanceCholine, ModuleSignificanceCitrate,
ModuleSignificanceCitruiline, ModuleSignificanceCreatine,
ModuleSignificanceFructose, ModuleSignificanceFucose,
ModuleSignificanceGlucuronate,
ModuleSignificanceGlucose.1.phosphate,
ModuleSignificanceGlucose.6.phosphate,
ModuleSignificanceGlucose, ModuleSignificanceGlycine,

```

```

ModuleSignificanceGlyceraldehyde,
ModuleSignificanceCholine,
ModuleSignificanceGlycerophosphocholine,
ModuleSignificanceGlutathione,
ModuleSignificanceIsoleucine,
ModuleSignificanceInositol, ModuleSignificanceLactose,
ModuleSignificanceLeucine, ModuleSignificanceLysine,
ModuleSignificanceMaltose, ModuleSignificanceMannose,
ModuleSignificanceMethionine, ModuleSignificancePinitol,
ModuleSignificanceProline, ModuleSignificanceShikimate,
ModuleSignificanceSuccinate,
ModuleSignificanceSucrose, ModuleSignificanceThreonine,
ModuleSignificanceHydroxyproline, ModuleSignificanceXylose,
ModuleSignificanceUnknown_Sugar, ModuleSignificanceGPC_Cho,
ModuleSignificanceIns_Gly)
names(moduleInfo0) = names(datTraits)
write.table(moduleInfo0,
file="ModuleSignificanceTraits.csv", row.names=T, sep=",")

# Calculate the intramodular connectivity

ADJ1=abs(cor(datExpr, use="p"))^6
Alldegrees1=intramodularConnectivity(ADJ1, moduleColors)
head(Alldegrees1)

#Relationship between gene significance and intramodular
connectivity for Whor1 (it can be made for any trait
changing to the appropriate "GeneSignificance..." objet)

colorlevels=unique(moduleColors)
sizeGrWindow(9,6)
par(mfrow=c(4,3))
par(mar = c(4.5,5,4,3))
par(cex=0.5)
for (i in c(1:length(colorlevels)))
{
  whichmodule=colorlevels[[i]]
  restrict1 = (moduleColors==whichmodule)
  verboseScatterplot(Alldegrees1$kWithin[restrict1],
GeneSignificance1[restrict1], col=moduleColors[restrict1],
main=whichmodule, xlab = "Connectivity", ylab = "Gene
Significance", abline = TRUE)
}

#Generalizing intramodular connectivity for all genes on
the array

datKME=signedKME(datExpr, datME, outputColumnName="MM.")

#Relationship between the module membership measures (e.g.
MM.turquoise) and intramodular connectivity (it can be made

```



```

for any trait and module changing to the appropriate
"which.color=..." value)

sizeGrWindow(8,6)
which.color="black";
restrictGenes=moduleColors==which.color
verboseScatterplot(Alldegrees1$kWithin[
restrictGenes],(datKME[restrictGenes, paste("MM.",
which.color, sep="")]^6, col=which.color,
xlab="Intramodular Connectivity",ylab="(Module
Membership)^6", main=which.color)

# Gene screening method based on a detailed definition
module membership (it can be made for any trait changing to
the appropriate "y" value)

NS1=networkScreening(y=datTraits$Whorl, datME=datME,
datExpr=datExpr, oddPower=3, blockSize=2000,
minimumSampleSize=4,addMEy=TRUE, removeDiag=FALSE,
weightESy=0.5, getQValues=TRUE)

# Comparing the weighted correlation with the standard
Pearson correlation
# Form a data frame containing standard and network
screening results and plot the comparison

CorPrediction1=data.frame(GS1,NS1$cor.Weighted)
cor.Weighted1=NS1$cor.Weighted
sizeGrWindow(8, 6)
par(mar = c(4,5,3,3))
par(cex=1.5)
verboseScatterplot(cor.Weighted1, GS1,main="Network-based
weighted correlation versus Pearson
correlation\n",col=moduleColors, cex.main = 1.2)
abline(0,1)

# Output of the results of network screening analysis

GeneResultsNetworkScreening1=data.frame(GeneName=row.names(
NS1), NS1)
annot = read.csv(file = "AnnotationPinarray2.csv")
dim(annot)
names(annot)
probes = names(datExpr)
probes2annot = match(probes, annot$Name)
sum(is.na(probes2annot))
geneInfo1 = data.frame(name = probes, Description =
annot$Description[probes2annot], SustainPine3 =
annot$SustainPine3[probes2annot],ID =
annot$ID[probes2annot],GO_Terms =

```

```

annot$GO_terms_Sma3[probes2annot],moduleColor =
moduleColors,GeneResultsNetworkScreening1)
write.table(geneInfo1,
file="GeneResultsNetworkScreeningWhor1.csv",
row.names=F,sep=",")

# Save the output of eigengene information

datMEy = data.frame(datTraits$Whor1, datME)
eigengeneSignificancel = cor(datMEy, datTraits$Whor1)
eigengeneSignificancel[1,1] =
(1+max(eigengeneSignificancel[-1, 1]))/2
eigengeneSignificancel.pvalue =
corPvalueStudent(eigengeneSignificancel, nSamples =
length(datTraits$Whor1))
namesME=names(datMEy)
out1=data.frame(t(data.frame(eigengeneSignificancel,
eigengeneSignificancel.pvalue, namesME, t(datMEy))))
dimnames(out1)[[1]][1]="EigengeneSignificance"
dimnames(out1)[[1]][2]="EigengeneSignificancePvalue"
dimnames(out1)[[1]][3]="ModuleEigengeneName"
dimnames(out1)[[1]][-c(1:3)]=dimnames(datExpr)[[1]]
write.table(out1,
file="MEResultsNetworkScreeningWhor1.csv", row.names=TRUE,
col.names = TRUE, sep=",")

# Plot the signed and unsigned correlations of the 30 top
genes for a trait

topList=rank(NS1$p.Weighted,ties.method="first")<=30
gene.names= names(datExpr)[topList]
sizeGrWindow(7,7)
par(cex.main=0.5)
plotNetworkHeatmap(datExpr, plotGenes = gene.names,
networkType="signed", useTOM=FALSE, power=14, main="A.
signed correlations")
sizeGrWindow(7,7)
par(cex.main=0.5)
plotNetworkHeatmap(datExpr, plotGenes = gene.names,
networkType="unsigned", useTOM=FALSE, power=14, main="B.
unsigned correlations")
sizeGrWindow(7,7)
par(cex.main=0.5)
plotNetworkHeatmap(datExpr, plotGenes =
gene.names,networkType="signed", useTOM=TRUE, power=14,
main="C. TOM in a signed network")
sizeGrWindow(7,7)
par(cex.main=0.5)
plotNetworkHeatmap(datExpr, plotGenes =
gene.names,networkType="unsigned", useTOM=TRUE, power=14,
main="D. TOM in an unsigned network")

```

```
# Network output file for VisAnt (it can be made for any
module cahnging the "module=..." value)
```

```
module = "black";
probes = names(datExpr)
inModule = (moduleColors==module)
modProbes = probes[inModule]
modTOM = TOM[inModule, inModule]
dimnames(modTOM) = list(modProbes, modProbes)
vis = exportNetworkToVisANT(modTOM, file =
paste("VisANTInput-", module, ".txt", sep=""), weighted =
TRUE, threshold = 0, probeToGene = data.frame(annot$Name,
annot$SustainPine3))
```

```
# Network output file for VisAnt only for 100 genes (it can
be made for any module cahnging the "module=..." value)
```

```
module = "black"
probes = names(datExpr)
inModule = (moduleColors==module)
modProbes = probes[inModule]
modTOM = TOM[inModule, inModule]
dimnames(modTOM) = list(modProbes, modProbes)
nTop = 100
IMConn = softConnectivity(datExpr[, modProbes])
top = (rank(-IMConn) <= nTop)
vis = exportNetworkToVisANT(modTOM[top, top], file =
paste("VisANTInput-", module, "-top100.txt", sep=""),
weighted = TRUE, threshold = 0, probeToGene =
data.frame(annot$Name, annot$SustainPine3))
```

```
# Network output file for Cytoscape (it can be made for any
module cahnging the "module=..." value)
```

```
module = "black"
probes = names(datExpr)
inModule = is.finite(match(moduleColors, module))
modProbes = probes[inModule]
modGenes = annot$Name[match(modProbes, annot$SustainPine3)]
modTOM = TOM[inModule, inModule]
dimnames(modTOM) = list(modProbes, modProbes)
cyt = exportNetworkToCytoscape(modTOM, edgeFile =
paste("CytoscapeInput-edges-", paste(module, collapse="-"),
".txt", sep=""), nodeFile = paste("CytoscapeInput-nodes-",
paste(module, collapse="-"), ".txt", sep=""), weighted =
TRUE, threshold = 0, nodeNames = modProbes, altNodeNames =
modGenes, nodeAttr = moduleColors[inModule])
```

```
# Network output file for Cytoscape only for 100 genes (it
can be made for any module cahnging the "module=..." value)

module = "black"
probes = names(datExpr)
inModule = is.finite(match(moduleColors, module))
modProbes = probes[inModule]
modGenes = annot$Name[match(modProbes, annot$SustainPine3)]
modTOM = TOM[inModule, inModule]
dimnames(modTOM) = list(modProbes, modProbes)
nTop = 100;
IMConn = softConnectivity(datExpr[, modProbes])
top = (rank(-IMConn) <= nTop)
cyt = exportNetworkToCytoscape(modTOM[top, top], edgeFile =
paste("CytoscapeInput-edges-", paste(module, collapse="-"),
"-top100.txt", sep=""), nodeFile = paste("CytoscapeInput-
nodes-", paste(module, collapse="-"), "-top100.txt",
sep=""), weighted = TRUE, threshold = 0, nodeNames =
modProbes, altNodeNames = modGenes, nodeAttr =
moduleColors[inModule])
```
